# Supplementary material for: Gene Network Visualization and Quantitative Synteny Analysis of more than 300 Marine T4-Like Phage Scaffolds from the GOS Metagenome
Source: PubMed Central journal article supplement — Mol Biol Evol. 2010 Mar 15;27(8):1935–44. doi: 10.1093/molbev/msq076 (PMC2908710; doi:10.1093/molbev/msq076), 2010-03-15
Supplement: msq076_1.pdf [file msq076_1.pdf]

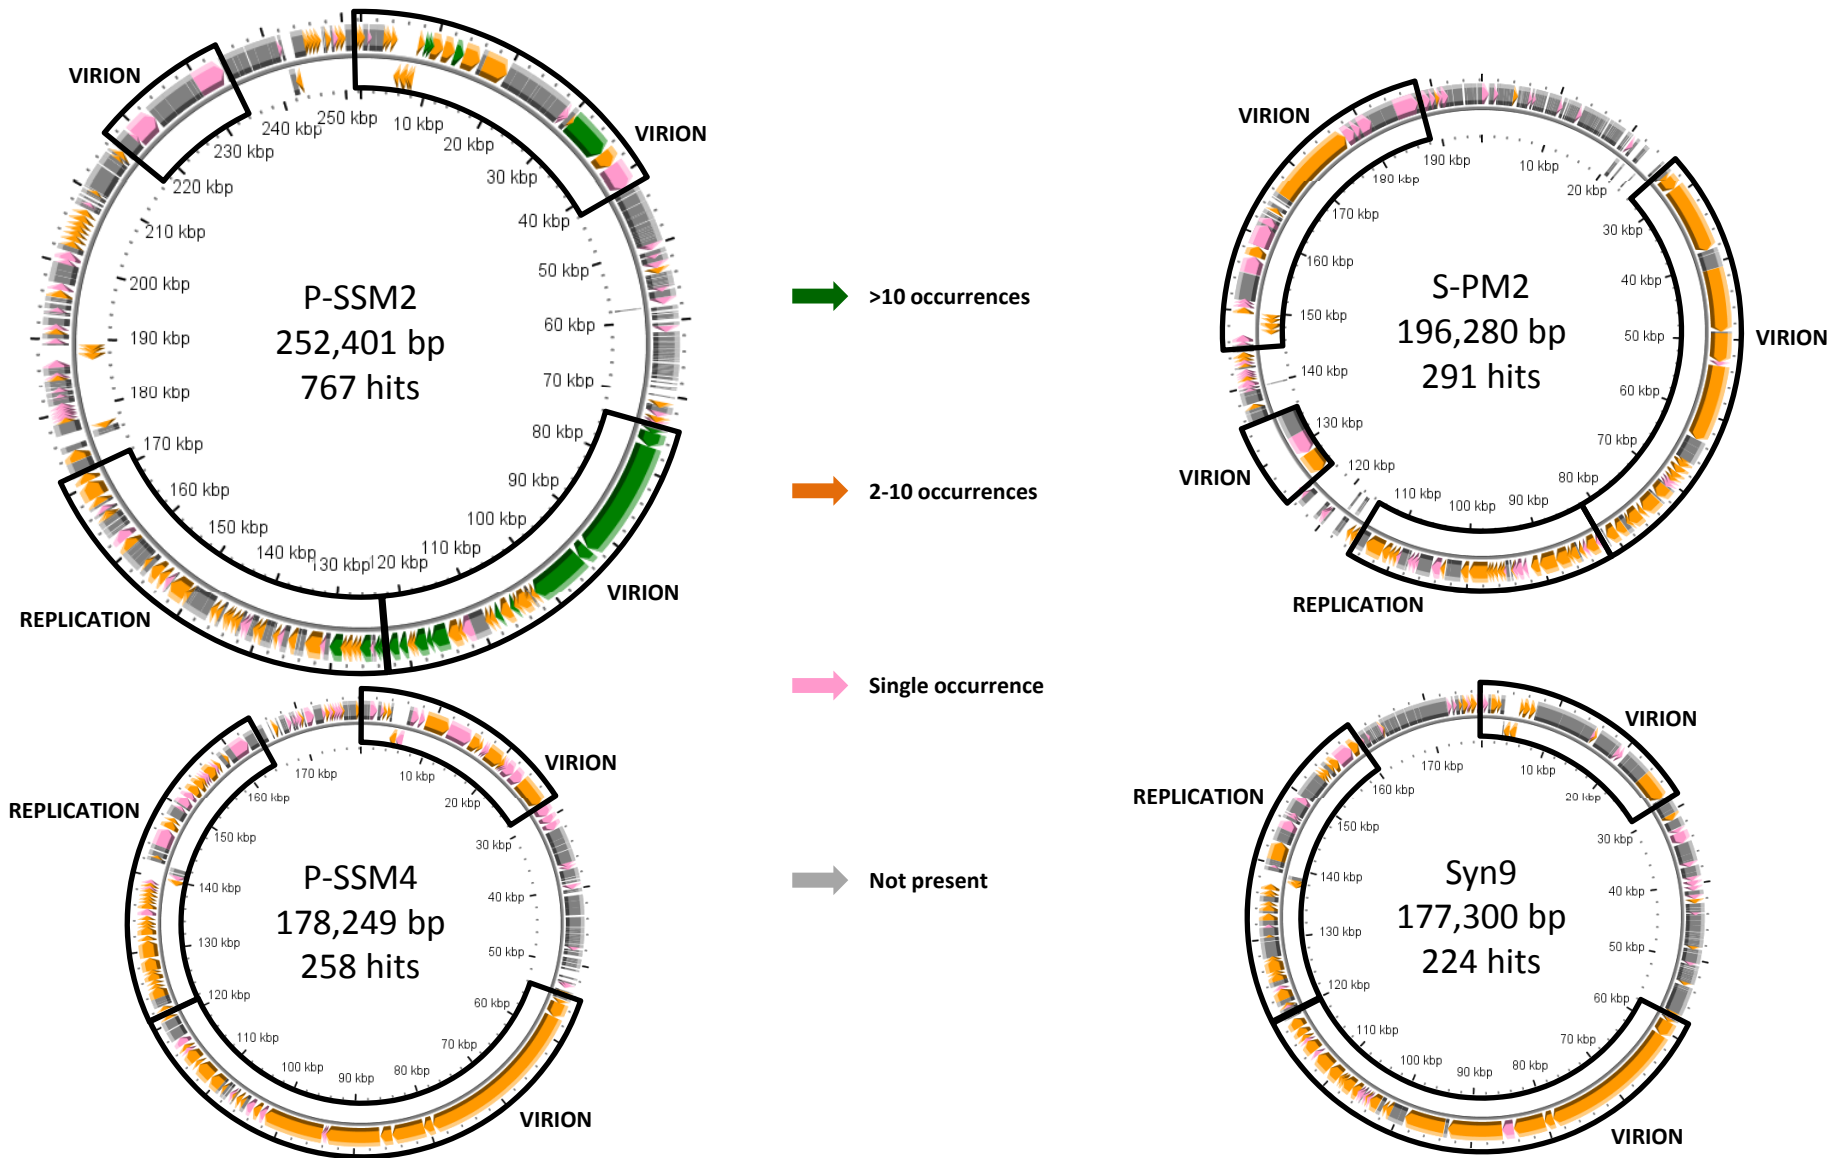

**Figure S1.** GOS scaffold coverage of the Cyano-T4 genomes. The genomes of the four Cyano-T4 phages with significant hits on the scaffolds are presented, along with the coverage of individual genes/ORFs (different colors) and the conserved virion and replication modules (curved black boxes) indicated. The genomes are drawn to scale.
