# Supplementary material for: Gene Network Visualization and Quantitative Synteny Analysis of more than 300 Marine T4-Like Phage Scaffolds from the GOS Metagenome
Source: PubMed Central journal article supplement — Mol Biol Evol. 2010 Mar 15;27(8):1935–44. doi: 10.1093/molbev/msq076 (PMC2908710; doi:10.1093/molbev/msq076), 2010-03-15
Supplement: msq076_3.pdf [file msq076_3.pdf]

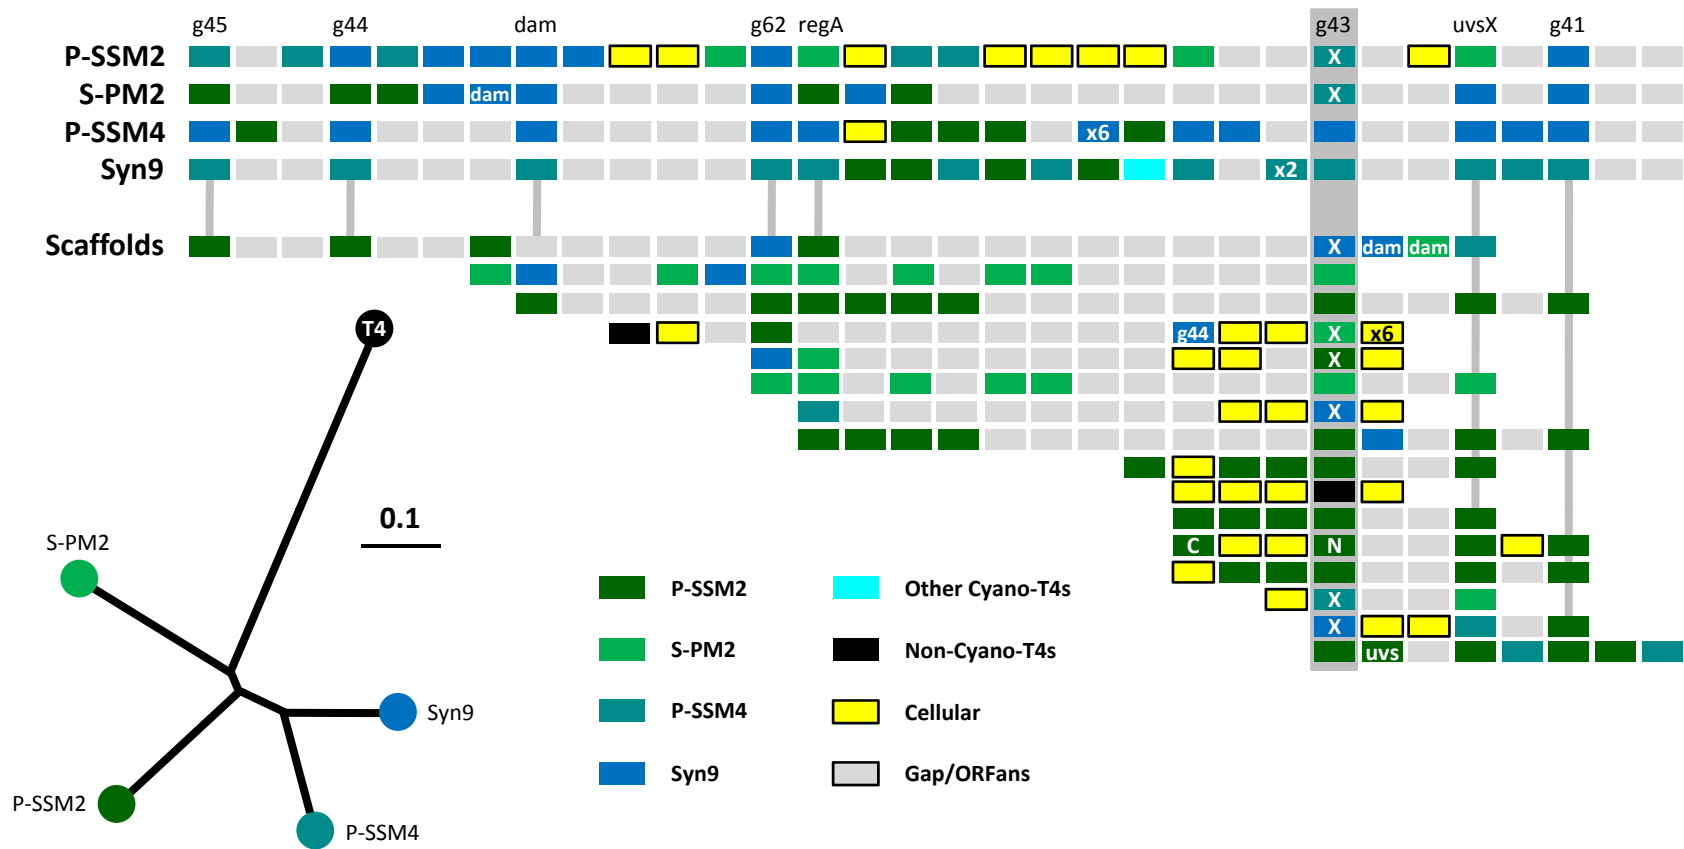

**Figure S3.** GOS scaffolds containing the *g43* DNA polymerase gene. Schematic of the scaffolds containing *g43*, with each gene/ORF (rectangles) colored to match its origin-type, compared to the cultured Cyano-T4 genomes in this region. Those *g43*s which do not represent the majority origin-type on the scaffolds or genomes are marked with an "X". Genes which have been duplicated and/or rearranged are indicated by their respective names within the colored squares, with the exception of one bicistronic *g43* (marked as "C" and "N" for the C- and N-terminal portions, respectively). Due to space considerations, some of the genes/ORFs of known origin have been condensed (ex: "x6") and some ORFans have been omitted. The phylogenetic tree inset shows the relationships among the Cyano-T4 gp43 proteins, with T4 as the outgroup and the scale bar indicating 0.1 substitutions per site.
