# Supplementary material for: Gene Network Visualization and Quantitative Synteny Analysis of more than 300 Marine T4-Like Phage Scaffolds from the GOS Metagenome
Source: PubMed Central journal article supplement — Mol Biol Evol. 2010 Mar 15;27(8):1935–44. doi: 10.1093/molbev/msq076 (PMC2908710; doi:10.1093/molbev/msq076), 2010-03-15
Supplement: msq076_4.pdf [file msq076_4.pdf]

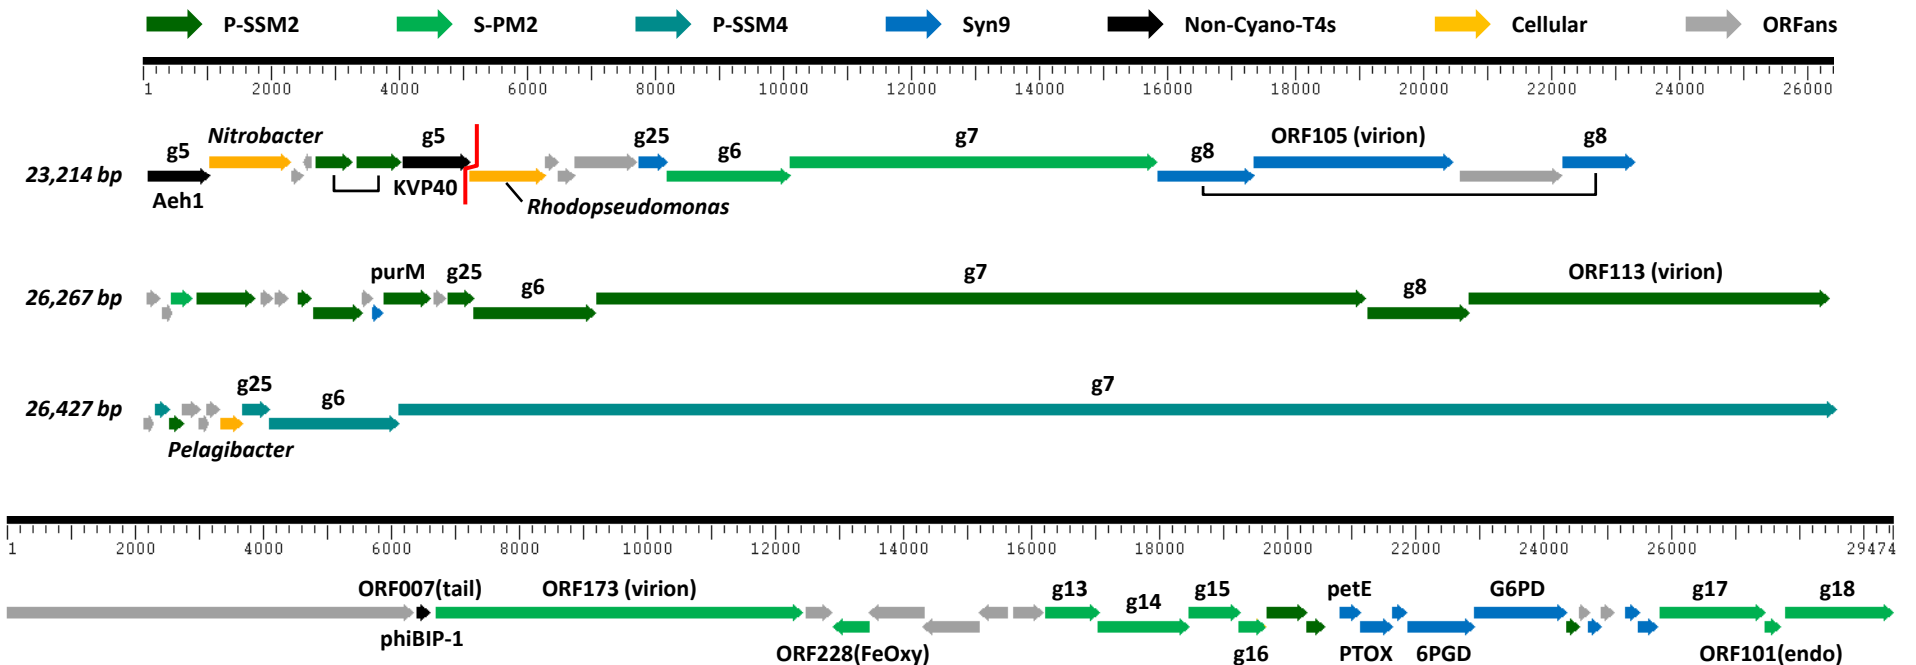

**Figure S4.** GOS scaffolds >20 kb in size. Each gene/ORF is colored to match its origin-type and functions, if known, are indicated. The “Non-Cyano-T4” origin-types are indicated below the respective genes/ORFs. Duplications are indicated by connecting bars. The vertical red line in the first scaffold indicates a break caused by a mate-pair gap (see Methods) >1 kb in size. PurM, purine biosynthesis enzyme; FeOxy, iron oxygenase; petE, plastocyanin; PTOX, plastoquinol terminal oxidase; 6PGD, 6-phosphogluconate dehydrogenase; G6PD, glucose 6-phosphate dehydrogenase; endo, endonuclease.
