# Supplementary material for: Gene Network Visualization and Quantitative Synteny Analysis of more than 300 Marine T4-Like Phage Scaffolds from the GOS Metagenome
Source: PubMed Central journal article supplement — Mol Biol Evol. 2010 Mar 15;27(8):1935–44. doi: 10.1093/molbev/msq076 (PMC2908710; doi:10.1093/molbev/msq076), 2010-03-15
Supplement: msq076_5.pdf [file msq076_5.pdf]

**Table S1**  
**Eubacterial Hits ( $E$  value  $<10^{-4}$ ) on the GOS Myovirus Scaffolds**

| Genus                     | Protein                                          | Hits <sup>a</sup> |
|---------------------------|--------------------------------------------------|-------------------|
| <b>Proteobacteria</b>     |                                                  | <b>79</b>         |
| <i>Acidiphilum</i>        | ORFan                                            |                   |
| <i>Acidovorax</i>         | ORFan                                            |                   |
| <i>Acidovorax</i>         | glycosyltransferase                              |                   |
| <i>Acinetobacter</i>      | cytidyltransferase                               |                   |
| <i>Agrobacterium</i>      | 30S protein                                      |                   |
| alpha-proteobacterium     | ORFans                                           | 6                 |
| <i>Arcobacter</i>         | S6 modifying enzyme                              |                   |
| <i>Aurantimonas</i>       | ORFan                                            |                   |
| <i>Bdellovibrio</i>       | ORFan                                            |                   |
| <i>Bordatella</i>         | ORFan                                            |                   |
| <i>Bradyrhizobium</i>     | A/G cyclase                                      |                   |
| <i>Bradyrhizobium</i>     | phycocyanobilin:ferredoxin oxidoreductase (PcyA) |                   |
| <i>Burkholderia</i>       | ORFans                                           | 2                 |
| <i>Burkholderia</i>       | outer membrane barrel proteins                   | 2                 |
| Candidatus Pelagibacter   | ORFans                                           | 4                 |
| Candidatus Pelagibacter   | permease                                         |                   |
| Candidatus Vesicomysocius | nuclease                                         |                   |
| <i>Caulobacter</i>        | tryptophan halogenase                            |                   |
| <i>Cellvibrio</i>         | halogenase                                       |                   |
| <i>Comamonas</i>          | ORFans                                           | 2                 |
| <i>Desulfococcus</i>      | adhesin protein (YadA)                           | 2                 |
| <i>Erythrobacter</i>      | ferredoxin                                       |                   |
| <i>Escherichia</i>        | endonuclease                                     |                   |
| <i>Francisella</i>        | epimerase                                        |                   |
| gamma-proteobacterium     | Hsp70 chaperone (DnaK)                           |                   |
| gamma-proteobacterium     | O-antigen biosynthesis protein (RbfC)            |                   |
| <i>Geobacter</i>          | LamG domain protein                              |                   |
| <i>Gluconacteobacter</i>  | ORFans                                           | 2                 |
| <i>Haemophilus</i>        | methylase                                        |                   |
| <i>Haemophilus</i>        | phage protein                                    |                   |
| <i>Hyphomonas</i>         | FeS protein                                      |                   |
| <i>Leptothrix</i>         | Mn-oxidizing protein (MofA)                      |                   |
| <i>Magnetococcus</i>      | ORFans                                           | 2                 |
| <i>Magnetospirillum</i>   | ORFan                                            |                   |
| <i>Mariprofundus</i>      | ORFan                                            |                   |
| <i>Neisseria</i>          | methylase                                        |                   |
| <i>Nitrobacter</i>        | ORFans                                           | 2                 |
| <i>Oceanicaulis</i>       | ORFan                                            |                   |
| <i>Phaeobacter</i>        | ORFans                                           | 2                 |
| <i>Polynucleobacter</i>   | exonuclease                                      |                   |
| <i>Pseudoalteromonas</i>  | ORFan                                            |                   |
| <i>Ralstonia</i>          | glycosyltransferase                              |                   |
| <i>Rhodobacter</i>        | ORFan                                            |                   |
| <i>Rhodobacter</i>        | carboxyl transferase                             |                   |
| <i>Rhodobacter</i>        | FeS binding protein                              |                   |
| <i>Rhodopseudomonas</i>   | ORFan                                            |                   |

|                           |                                  |           |
|---------------------------|----------------------------------|-----------|
| <i>Rhodopseudomonas</i>   | isomerase                        |           |
| <i>Roseobacter</i>        | glycosyltransferase              |           |
| <i>Roseovarius</i>        | ORFans                           | 3         |
| <i>Sagittula</i>          | outer membrane barrel proteins   | 2         |
| <i>Salmonella</i>         | ORFan                            |           |
| <i>Silicibacter</i>       | ORFans                           | 2         |
| <i>Sinorhizobium</i>      | ORFan                            |           |
| <i>Stenotrophomonas</i>   | ORFan                            |           |
| <i>Stigmatella</i>        | methylase                        |           |
| <i>Syntrophobacter</i>    | ORFan                            |           |
| <i>Syntrophus</i>         | ORFan                            |           |
| <i>Vibrio</i>             | ORFan                            |           |
| <i>Vibrio</i>             | S6 modifying enzyme              |           |
| <b>Cyanobacteria</b>      |                                  | <b>35</b> |
| <i>Aphanizomenon</i>      | ferredoxin                       |           |
| <i>Cyanothece</i>         | ORFan                            |           |
| <i>Cyanothece</i>         | ferredoxin                       |           |
| <i>Cylindrospermopsis</i> | S-PM2 ORF077                     |           |
| <i>Microcystis</i>        | ORFan                            |           |
| <i>Nostoc</i>             | thymidylate synthase             |           |
| <i>Nostoc</i>             | transferase                      |           |
| <i>Prochlorococcus</i>    | ORFans                           | 5         |
| <i>Prochlorococcus</i>    | carboxyl esterase                |           |
| <i>Prochlorococcus</i>    | fructose-1,6-P aldolase          |           |
| <i>Prochlorococcus</i>    | high light-inducible protein     | 3         |
| <i>Prochlorococcus</i>    | OH methylase                     |           |
| <i>Prochlorococcus</i>    | P-heptose isomerase              | 2         |
| <i>Prochlorococcus</i>    | photosystem II D1 protein (PsbA) |           |
| <i>Prochlorococcus</i>    | phosphatase                      |           |
| <i>Prochlorococcus</i>    | plastoquinol terminal oxidase    |           |
| <i>Prochlorococcus</i>    | thymidylate synthase             |           |
| <i>Synechococcus</i>      | ORFans                           | 5         |
| <i>Synechococcus</i>      | ABC transporter                  |           |
| <i>Synechococcus</i>      | decarboxylase                    |           |
| <i>Synechococcus</i>      | epimerase                        |           |
| <i>Synechococcus</i>      | outer membrane barrel protein    |           |
| <i>Synechococcus</i>      | quinol reductase                 | 2         |
| <b>Firmicutes</b>         |                                  | <b>16</b> |
| <i>Anaerotruncus</i>      | Na symporter                     |           |
| <i>Bacillus</i>           | ORFan                            |           |
| <i>Bacillus</i>           | UDP galactopyranose mutase       |           |
| <i>Brevibacillus</i>      | recombinase                      |           |
| <i>Clostridium</i>        | ORFans                           | 2         |
| <i>Clostridium</i>        | CDP dehydrogenase                |           |
| <i>Clostridium</i>        | glycosyltransferase              |           |
| <i>Clostridium</i>        | primase                          |           |
| <i>Coprococcus</i>        | methylase                        |           |
| <i>Desulfotomaculum</i>   | S-PM2 ORF173 virion protein      | 2         |
| <i>Heliobacterium</i>     | ORFan                            |           |
| <i>Paenibacillus</i>      | ORFan                            |           |
| <i>Paenibacillus</i>      | phage methylase                  |           |
| <i>Pelotomaculum</i>      | ORFan                            |           |

|                                  |                               |          |
|----------------------------------|-------------------------------|----------|
| <b>Bacteroidetes (CFB)</b>       |                               | <b>9</b> |
| <i>Bacteroides</i>               | ORFan                         |          |
| <i>Flavobacterium</i>            | transmembrane protein         |          |
| <i>Kordia</i>                    | phage fiber                   | 2        |
| <i>Microscilla</i>               | ORFan                         |          |
| <i>Parabacteroides</i>           | ORFans                        | 2        |
| <i>Polaribacter</i>              | nucleotidyltransferase (TagD) |          |
| <i>Psychroflexus</i>             | isomerase                     |          |
| <b>Green-S/Non-S</b>             |                               | <b>6</b> |
| <i>Chlorobium</i>                | outer membrane barrel protein |          |
| <i>Dehalococcoides</i>           | ORFans                        | 2        |
| <i>Herpetosiphon</i>             | ORFan                         |          |
| <i>Prosthecochloris</i>          | ORFan                         |          |
| <i>Roseiflexus</i>               | endonuclease                  |          |
| <b>Actinobacteria (high G+C)</b> |                               | <b>5</b> |
| <i>Frankia</i>                   | ORFan                         |          |
| <i>Nocardia</i>                  | ORFan                         |          |
| <i>Rubrobacter</i>               | ORFan                         |          |
| <i>Salinispora</i>               | peptidase                     |          |
| <i>Streptomyces</i>              | carboxyl transferase          |          |
| <b>Planctomycetes</b>            |                               | <b>4</b> |
| <i>Blastopirellula</i>           | ORFan                         |          |
| <i>Blastopirellula</i>           | glycosyltransferase           |          |
| Candidatus Kuenenia              | ORFan                         |          |
| <i>Gemmata</i>                   | ORFan                         |          |
| <b>Deinococcus-Thermus</b>       |                               | <b>3</b> |
| <i>Deinococcus</i>               | ORFan                         |          |
| <i>Thermus</i>                   | ORFans                        | 2        |
| <b>Verrucomicrobia</b>           |                               | <b>3</b> |
| <i>Opitutus</i>                  | ORFan                         |          |
| <i>Verrucomicrobium</i>          | Immunoglobulin domain         |          |
| <i>Verrucomicrobium</i>          | phage collar protein          |          |
| <b>Tenericutes (Mycoplasmas)</b> |                               | <b>1</b> |
| <i>Mycoplasma</i>                | UDP dehydrogenase             |          |
| <b>Spirochaetes</b>              |                               | <b>1</b> |
| <i>Spirochaeta</i>               | heptose-7-P kinase (HddA)     |          |
| <b>Thermotogae</b>               |                               | <b>1</b> |
| <i>Thermotoga</i>                | peptide deformylase           |          |
| <b>Unclassified</b>              |                               | <b>4</b> |
| termite bacterium                | ORFan                         |          |
| uncultured bacterium             | ORFans                        | 3        |

<sup>a</sup>The number of hits was 1 unless specified otherwise.
