# Supplementary material for: Gene Network Visualization and Quantitative Synteny Analysis of more than 300 Marine T4-Like Phage Scaffolds from the GOS Metagenome
Source: PubMed Central journal article supplement — Mol Biol Evol. 2010 Mar 15;27(8):1935–44. doi: 10.1093/molbev/msq076 (PMC2908710; doi:10.1093/molbev/msq076), 2010-03-15
Supplement: msq076_6.pdf [file msq076_6.pdf]

**Table S2**  
**Most Represented Proteins ( $\geq 10$  Hits) on the GOS Myovirus Scaffolds**

| Protein                                            | Hits |
|----------------------------------------------------|------|
| <b><i>Virion Proteins</i></b>                      |      |
| gp7 baseplate wedge initiator                      | 48   |
| gp20 portal vertex protein of head                 | 36   |
| gp18 tail sheath protein                           | 33   |
| gp6 baseplate wedge subunit                        | 27   |
| gp21 prohead core scaffold protein and protease    | 27   |
| gp19 tail tube protein                             | 25   |
| gp22 prohead core scaffold protein                 | 24   |
| gp8 baseplate wedge subunit                        | 22   |
| gp13 neck protein                                  | 21   |
| gp14 neck protein                                  | 21   |
| gp15 tail sheath stabilizer and completion protein | 20   |
| gp23 major head protein                            | 20   |
| gp25 baseplate wedge subunit                       | 19   |
| gp26 baseplate hub subunit                         | 19   |
| P-SSM2 ORF033 tail fiber protein                   | 18   |
| gp4 head completion protein                        | 17   |
| gp48 baseplate tail tube cap                       | 17   |
| gp53 baseplate wedge subunit                       | 17   |
| P-SSM2 ORF113 virion protein                       | 17   |
| gp3 tail completion and sheath stabilizer protein  | 16   |
| gp5 baseplate hub subunit and tail lysozyme        | 15   |
| gp2 DNA end protector protein                      | 13   |
| gp51 baseplate hub assembly catalyst               | 13   |
| P-SSM2 ORF018 virion protein                       | 13   |
| <b><i>Replication/Recombination Proteins</i></b>   |      |
| gp17 DNA terminase, large subunit                  | 28   |
| uvsW RNA-DNA and DNA-DNA helicase, ATPase          | 24   |
| gp46 recombination endonuclease subunit            | 19   |
| gp47 recombination endonuclease subunit            | 19   |
| gp55 sigma factor for T4 late transcription        | 18   |
| gp43 DNA polymerase                                | 17   |
| gp16 DNA terminase, small subunit                  | 15   |
| gp61 DNA primase subunit                           | 14   |
| gp62 clamp loader subunit                          | 14   |
| nrdA aerobic NDP reductase, large subunit          | 14   |
| regA translational repressor protein               | 14   |
| uvsY recombination, repair and ssb                 | 14   |
| S-PM2 ORF101 putative phage endonuclease           | 13   |
| uvsX RecA-like recombination protein               | 12   |
| gp41 DNA primase-helicase subunit                  | 11   |
| <b><i>Stress/Metabolism Proteins</i></b>           |      |
| cobS cobalamin biosynthesis                        | 11   |
| hsp20 small heat-shock protein                     | 10   |
| phoH phosphate stress-induced protein              | 10   |
