# Supplementary material for: Gene Network Visualization and Quantitative Synteny Analysis of more than 300 Marine T4-Like Phage Scaffolds from the GOS Metagenome
Source: PubMed Central journal article supplement — Mol Biol Evol. 2010 Mar 15;27(8):1935–44. doi: 10.1093/molbev/msq076 (PMC2908710; doi:10.1093/molbev/msq076), 2010-03-15
Supplement: msq076_7.pdf [file msq076_7.pdf]

**Table S3**  
**Core Genes within the Cultured Cyano-T4 Genomes**

| Protein                                                     | P-SSM2 | P-SSM4 | S-PM2 | Syn9 |
|-------------------------------------------------------------|--------|--------|-------|------|
| <b>Virion Proteins</b>                                      |        |        |       |      |
| gp3 tail completion and sheath stabilizer protein           | +      | +      | +     | +    |
| gp4 head completion protein                                 | +      | +      | +     | +    |
| gp5 baseplate hub subunit and tail lysozyme                 | +      | +      | +     | +    |
| gp6 baseplate wedge subunit                                 | +      | +      | +     | +    |
| gp7 baseplate wedge initiator                               | +      | +      | +     | +    |
| gp8 baseplate wedge subunit                                 | +      | +      | +     | +    |
| gp13 neck protein                                           | +      | +      | +     | +    |
| gp14 neck protein                                           | +      | +      | +     | +    |
| gp15 tail sheath stabilizer and completion protein          | +      | +      | +     | +    |
| gp18 tail sheath protein                                    | +      | +      | +     | +    |
| gp19 tail tube protein                                      | +      | +      | +     | +    |
| gp20 portal vertex protein of head                          | +      | +      | +     | +    |
| gp21 prohead core scaffold protein and protease             | +      | +      | +     | +    |
| gp22 prohead core scaffold protein                          | +      | +      | +     | +    |
| gp23 major head protein                                     | +      | +      | +     | +    |
| gp25 baseplate wedge subunit                                | +      | +      | +     | +    |
| gp26 baseplate hub subunit                                  | +      | +      | +     | +    |
| gp48 baseplate tail tube cap                                | +      | +      | +     | +    |
| gp51 baseplate hub assembly catalyst                        | +      | -      | +     | +    |
| gp53 baseplate wedge subunit                                | +      | +      | +     | +    |
| <b>Replication/Recombination/Modification Proteins</b>      |        |        |       |      |
| dam DNA adenine methyltransferase                           | +      | +      | +     | +    |
| gp16 terminase DNA packaging enzyme, small subunit          | +      | +      | +     | +    |
| gp17 terminase DNA packaging enzyme, large subunit          | +      | +      | +     | +    |
| gp32 single-stranded DNA binding protein                    | +      | +      | +     | +    |
| gp33 late promoter transcription accessory protein          | +      | +      | +     | +    |
| gp41 DNA primase-helicase subunit                           | +      | +      | +     | +    |
| gp43 DNA polymerase                                         | +      | +      | +     | +    |
| gp44 clamp loader subunit, DNA polymerase accessory protein | +      | +      | +     | +    |
| gp45 sliding clamp, DNA polymerase accessory protein        | +      | +      | +     | +    |
| gp46 recombination endonuclease subunit                     | +      | +      | +     | +    |
| gp47 recombination endonuclease subunit                     | +      | +      | +     | +    |
| gp55 sigma factor for T4 late transcription                 | +      | +      | +     | +    |
| gp59 loader of gp41 DNA helicase                            | +      | +      | -     | +    |
| gp61 DNA primase subunit                                    | +      | +      | +     | +    |
| gp62 clamp loader subunit, DNA polymerase accessory protein | +      | +      | +     | +    |
| nrdA aerobic NDP reductase, large subunit                   | +      | +      | +     | +    |
| nrdB aerobic NDP reductase, small subunit                   | +      | +      | +     | +    |
| regA translational repressor protein                        | +      | +      | +     | +    |
| uvsW RNA-DNA and DNA-DNA helicase, ATPase                   | +      | +      | +     | +    |
| uvsX RecA-like recombination protein                        | +      | +      | +     | +    |
| uvsY recombination, repair and ssDNA binding protein        | +      | +      | +     | +    |
